# Supplementary material
Source: publisher figshare collection journal article supplement (https://acs.figshare.com/ndownloader/files/15077969)
Supplement: Supplementary file 1 [file 15077969]

## Supporting Information

### High-Performance Symmetric Supercapacitor Constructed Using Carbon Cloth Boosted by Engineering Oxygen-Containing Functional Groups

Zhenyu Miao,<sup>†</sup> Yuan Huang,<sup>†</sup> Jianping Xin,<sup>†</sup> Xiaowen Su,<sup>†</sup> Yuanhua Sang,<sup>†</sup> Hong Liu,<sup>\*,†,‡</sup> and Jian-Jun Wang<sup>\*,†</sup>

<sup>†</sup> State Key Laboratory of Crystal Material, Shandong University, Jinan 250100, China

<sup>‡</sup> Institute for Advanced Interdisciplinary Research (IAIR), University of Jinan, Jinan 250022, China

\* E-mail: [hongliu@sdu.edu.cn](mailto:hongliu@sdu.edu.cn) (H.L.). \* E-mail: [wangjianjun@sdu.edu.cn](mailto:wangjianjun@sdu.edu.cn) (J.-J.W.).

## Calculation

Single Electrode: Areal capacitances of the single electrodes were calculated according to the following equation (GCD):

$$C_A = \frac{I \times \Delta t}{\Delta V \times S} \quad (1)$$

where  $C_A$  (F cm<sup>-2</sup>) is the areal capacitance,  $I$  (A) is the constant discharging current,  $\Delta t$  (s) is the discharging time,  $\Delta V$  (V) is the potential window, and  $S$  (cm<sup>2</sup>) is the surface area of electrode.

AECC //AECC-SCs: the cell (device) capacitance ( $C_{cell}$ ) and volumetric capacitance ( $C_V$ ) was estimated from galvanostatic charge/discharge information using the following equations:

$$C_{cell} = \frac{I \times \Delta t}{\Delta V} \quad (2)$$

$$C_V = \frac{C_{cell}}{V} = \frac{I \times \Delta t}{V \times \Delta V} \quad (3)$$

where,  $I$  (A) is the applied current,  $V$  (cm<sup>2</sup>) is the area of the whole device,  $\Delta t$  (s) is the discharging time,  $\Delta V$  (V) is the voltage window.

Areal energy density and power density of the devices were obtained from the following equations:

$$E = \frac{1000}{2 \times 3600} C_A \Delta V^2 \quad (4)$$

$$ESR = \frac{iR_{drop}}{2I} \quad (5)$$

$$P = \frac{\Delta V^2}{4ESR \times V} \quad (6)$$

where  $C_V$  is the volumetric capacitance obtained from Equation (3) and  $\Delta V$  (V) is the voltage window.  $ESR$  ( $\Omega$ ) is the internal resistance of the device.  $iR_{drop}$  is the voltage drop between first and second points from its cut-off of discharge curve.  $V$  is the volume of the device.

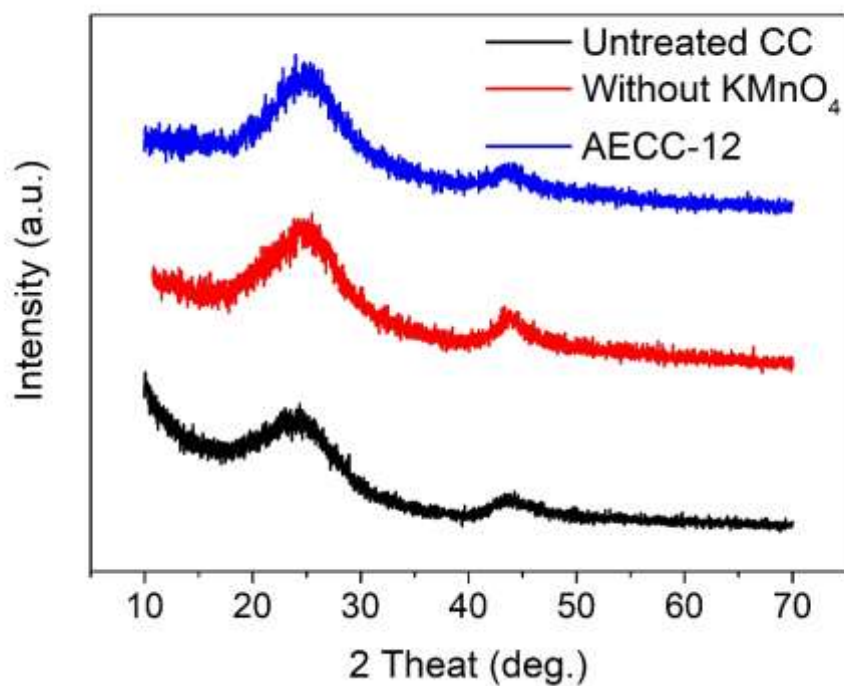

**Figure S1** XRD pattern of the untreated CC, acid-etched CC without KMnO<sub>4</sub> and AECC-12 samples.

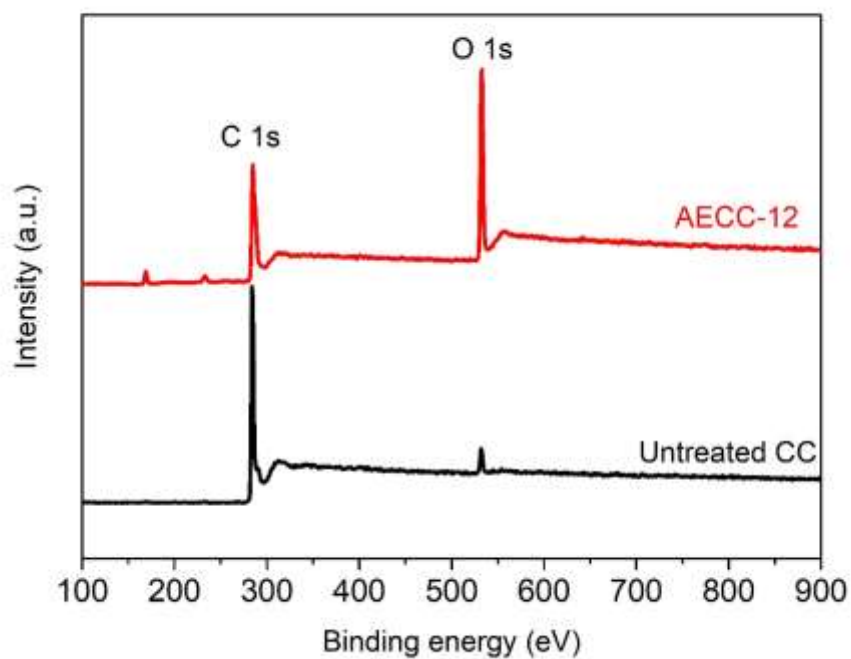

**Figure S2** XPS survey spectra of the untreated CC and AECC-12 samples.

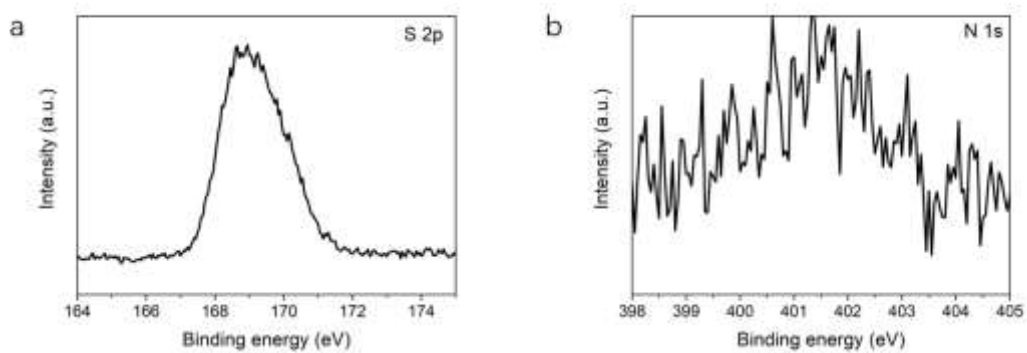

**Figure S3** High resolution XPS (a) S2p and (b) N1s spectrum of AECC-12 sample.

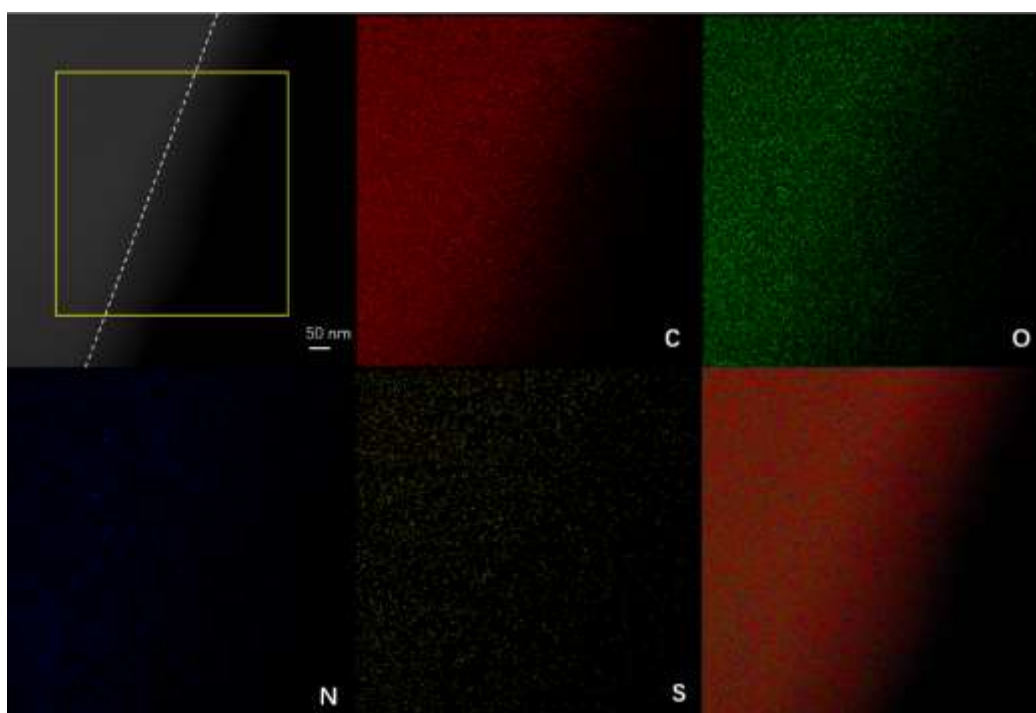

**Figure S4** HAADF-STEM image and corresponding elemental mapping images of AECC-12.

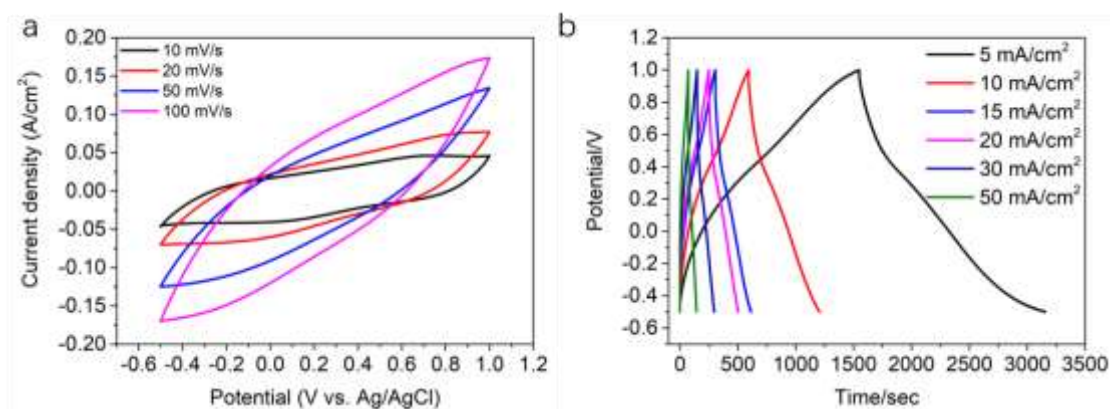

**Figure S5** (a) CV curves for the AECC-12 electrode collected at different scan rate (b) Galvanostatic charge/discharge curve collected at different current density.

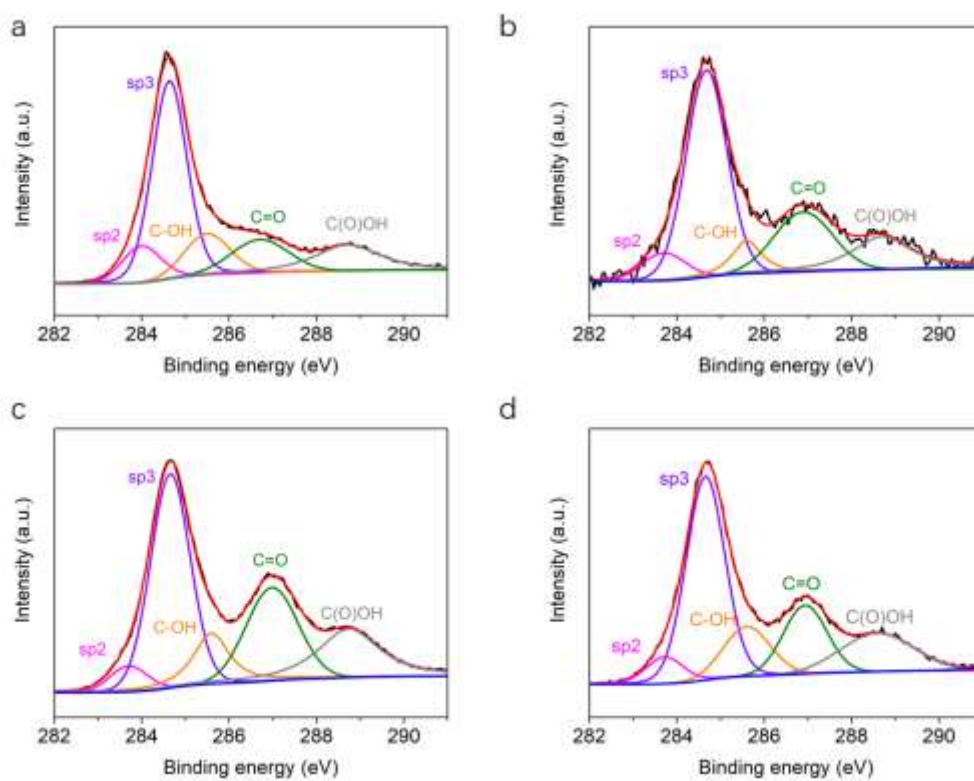

**Figure S6** deconvoluted C1s XPS spectrum of the (a)AECC-1, (b)AECC-6, (c) AECC-12 and (d) AECC-24 sample

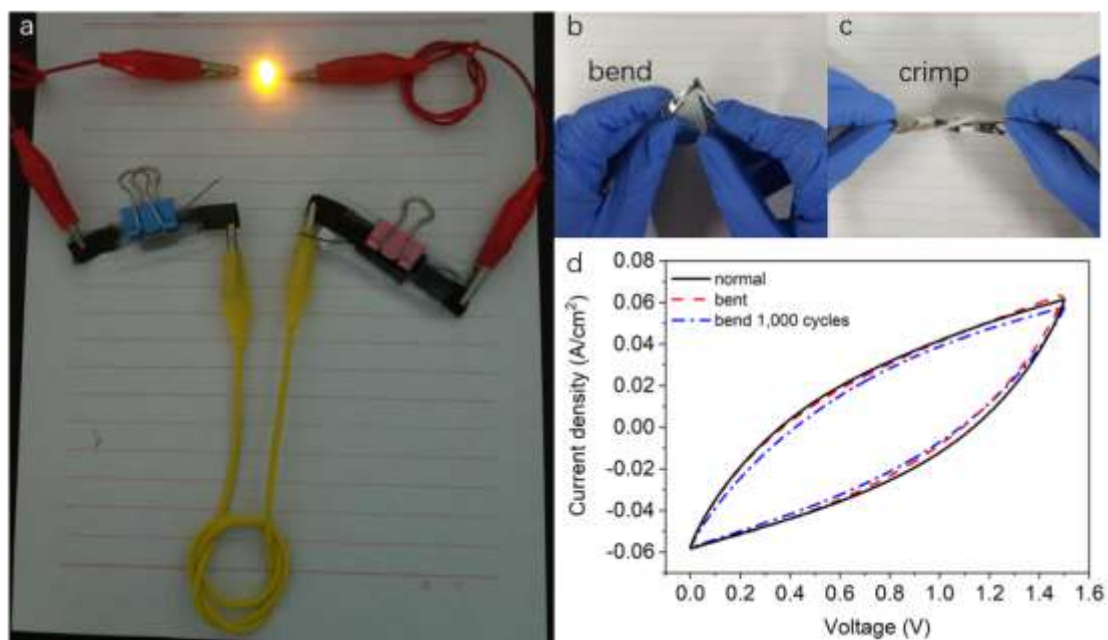

**Figure S7** (a) a digital picture of two solid-state symmetric SCs devices in series powered the LED (3 V) indicators. Flexible all-solid-state symmetric SCs at the (b)bent and (c)crimp status. (d) CV curves of the flexible all-solid-state symmetric SC device collected at a scan rate of 100 mV s<sup>-1</sup> under normal, bent and bent 1,000 cycles conditions.
